# Supplementary material for: Zfhx4 regulates endochondral ossification as the transcriptional platform of Osterix in mice
Source: PubMed Central journal article supplement (PMC8566502; doi:10.1038/s42003-021-02793-9), 2021-11-03
Supplement: 42003_2021_2793_MOESM2_ESM.pdf [file 42003_2021_2793_MOESM2_ESM.pdf]

## Supplementary information

### Supplementary materials and methods

#### Sequence of the probe for Southern blot analysis of *Zfhx4* floxed mice

5'-TGGAAGCAGGCCATCCTGAACTGAGTGAAGCTGAACTGCAGCAGCTCTATGC  
CTCCTTGCCAATGAATGGTGAAGCTCTGGGCAGAGAGTGAAGACAATGACCCAGGAT  
GACCATGGCATAGATCAGGAAATGGAGAGAGAATATGAGGTGGACCATGAAGGGA  
AGGCAAGTCCTGTAGAGAGCGACAGCAGCTCTATCCCAGATGATCTGGGCTTGGA  
ACCAAAGCGGACCTTACCTTTTAGAAAAGGACCCAACTTTACAATGGAAAAATTCT  
CGATCCATCTCGTCCTTACAAGTGTACAGTGTGTAAGAGTCATTTACCCAAAAGAA  
CATTCTCTTGGTCCATTATAATTCAGTGTCTCACTTGCATAAGTTGAAAAAGGTTTTG  
CAAGAAGCCTCCAGTCTGTCCCCCAGGAAGCCAATAGCAGCACAGATAATAAGC  
CCTACAAGTGCAGCACCTGCAGTGTGCATACAGCCAAAGCTCGACCTTGGAGAT  
CCACATGAGATCAGTGTCTCCACCAGACAAAGGCCAGGGCTGCAAAGCTGGAACC  
AAGTAGACACCTACCCAGTGGTCATAGCATCACAGCT-3'

#### Target sequences of probes for ISH and WISH analyses of *Zfhx4*

##### For *Zfhx4-1* probe

5'-TACCTCACTCAGTCTGCTCCCCTCCTCCTAACACCTCATCTACCTCGCCGTCT  
GCAGTTCTTCTAATAACACCTACCCTCATCTCTCTTGCTTCTCCATGAAGTCCTG  
GCCTAATATCCTTTTCCAAGCATCCGCCAGGAAAGCTGCTTCGTCCCCCTCTTCTC  
CTCCCTCCCTCTCCTTGCCCTTCAACGGTTACCTCAAGTTTGTGCAGCACCTCAGG  
GGTTCAAACCTCACTACCCACAGAAAGTTGTTTCAAGATGAGTCTGACAGTGAGCTG  
AGCCAGAAGCTACAAGACTTAGATAATTCTTTGGAAGTGAAAGCTAAACCTGCTTC  
TGGCCTAGATGGTAATTTCAATAGTGTCCGAATGGATATGTTTCAAGTGTGTAGGAGT  
GAAGACAGGATCCCGTGCTTAAAAAAAAAATTTAAAAATAAAAAATTTTTAAAAAAG  
ACTTTAACTGCAGTTCCAAAGCTTCTCTAACCCAAAAATTACAGTACCAAATGATTG  
ACTCAGGATTGTTTTTCCCATATTGATATGCTGGCAATATAGGATGGTATGTGGTG  
AAGAAGACTAATGCAGGTGGTTGAATGCGCTTGTAAATATATGCTAAAATATGGAAA  
AGGAAAAAATATCTCACAAGTTCTTTGGGAACTTGTTCAGCCAAAAACTCTCA  
AGACAGAAAATTGCACCTCAGCTGGGTTGATTTCAAATGCCAGCATGGACAGT-3'

##### For *Zfhx4-2* probe

5'-GTCCAAAAGCAATGATCGGCCTGGTCACAAGCGCTTCAGAACCCAGATGAGCA

ATCTTCAACTAAAGGTCCTCAAGGCTTGCTTCAGTGACTATCGGACTCCAACCATG  
CAAGAATGTGAAATGCTGGGCAATGAGATTGGTCTGCCCAAACGAGTGGTGCAG  
GTGTGGTTTCAGAATGCTAGGGCAAAGGAAAAGAAGTTTAAAATTAATATAGGAAA  
GCCGTTTCATGATCAATCAAAGTGGAACAGATGGTACTAAGCCAGAGTGTACCCTC  
TGTGGGGTGAAGTACTCTGCCCGCTTGCCATCCGAGATCATATTTTTTCCAAACA  
GCATATTTCCAAAGTGAGGGAGACTGTGGGCAGTCAGCTTGACCGGGAGAAAGA  
TTACCTTGCTCCTACCACCGTTCGACAGCTAATGGCCCAACAAGAACTGGACCGT  
ATAAAGAAAGCTTCTGATGTGCTGGGCCTAACAGTACAGCAGCAAGGCATCACCG  
ATAACTGCTCGCTGCATGGTATCAGCTTGCAAGCAGCCTACCCTGGGCTCCCTGG  
CCTTCCTCCAGTCATTCTTCCTGGAATGAATGGCCCTTCCTCCTTGCCAGGATTC  
CACAAAATTCAAACACATTAACATCTCCGGGTACAGGTATGCTTGGGTTTCCTAGT  
TCAGTACTTCGTCTCCTGCCCTGTCTCTCAGCAGTGGCCCCACCAAATCTTTGCT  
GCAGACTCCACCACCTCCACCACCACCTCCTCCTCCTCCATCCTCTCTGTCAGGA  
CAGCAGACCGAGCCACAGAACAAGAATCGGAGAAAAAGCAAATAAGCCAAACA  
AGGTGAAAAAATCAAGGAGGAGGAATCGGAGGCTATCAAACCCGAAAAGCACC  
CCAAAAAGGAGGAAAAAATCTCATCTGCTCTTACAGTGTTGGGCAAAGTGGTAGG  
GGAAACACACATGGATCCTACTCAGCTGCAGGCCTTGCAAGTGAATTGCTGGG  
GACCCAGCATCCTTTATAGGAGGGCAGTTCTTGCCATACTTTATCCCTGGGTTTGC  
ATCCTACTTTTACCTCAGCTCCCTGGAACAGTGCAGGGAGGCTACCTGCCACCA  
ATCTGTGGCATGGAGAGTCTCTTTCCCTATGGTCCTGCAGTACCTCAGACACTGG  
CGGGCCTGTCCCCAGGGGCGCTTCTACAGCAGTAC-3'

**For *Zfhx4-3* probe**

5'-ACCTGATCCAACCTTCCGCGGTTTATGGAGCGCTTTTCATGTTGAAAACGGTGA  
CTCTTTGCAGGCTGGCTTTGCCTTCTTGAAGGGAAGTGAAGCCCTTCCAGCTCA  
GCAGAACAGCCGCTGGGGATCACCCACATGCCAAAGGCTGAAGTGAACCTGGGG  
GGGCTGTCTAGTTTAGTAGTGAACACCCCAATTACCTCCGTCTCCCTCAGCCACTT  
ATCATCTGAGTCTAGCAAGATGTCAGAGAGCAAAGACCAAGAGAACAACCTGTGAA  
AGGCCAAAAGAAAGTACCATCTTACACCCGAATGTGGGGTGCCCTGTCAAAAGTG  
AACCCACTGAGCCGGGAGATGAGGATGAAGAGGATGCATATTCCAATGAACTCGA  
TGACGAGGAAGTATTAGGTGAACTCACAGATAGTATTGGTAATAAAGATTTCCCTC  
TCTTAAACCAAAGCATTCTCCTTTATCATCCAGTGTGCTAAAATTTATTGAAAAG  
GTACCTCGTCCTCCTCGGGGACTATTGCTGAA-3'

**Whole mount *in situ* hybridization (WISH)**

A digoxigenin (DIG)-labeled single-stranded *Zfhx4-3* mRNA probe

(Supplementary information) was synthesized using a DIG RNA Labeling Kit (Roche, Basel, Switzerland). ICR mouse embryos (E12) fixed with 4% paraformaldehyde in PBS were hybridized and visualized as described previously<sup>29</sup>.

### **Measurement of hypertrophic chondrocyte and calcified area of femurs of mice.**

Hypertrophic chondrocyte area and calcified areas visualized by von Kossa staining were measured by Image J software (National Institutes of Health, Bethesda, MA, USA).

### **In vitro binding assay**

Lysates of 293FT cells transfected with or without Flag-Zfhx4 were immunoprecipitated with an anti-Flag antibody and protein G-conjugated magnetic beads. Each immunoprecipitated protein was incubated with lysates of limb bud cells isolated from wildtype or *Osterix* KO littermates and then precipitated by a magnet. The proteins associated with protein G-conjugated magnetic beads were determined by western blotting using anti-Runx2 (Cell Signaling Technology, Danvers, MA, USA) or -Flag antibodies. Small amounts of immunoprecipitates were used as input.

### **Luciferase reporter assay**

The 1, 5, and 10 kb regions of the *Mmp13* gene promoter were amplified by PCR using specific primer sets (Supplementary Table 1). Then, the 1 kb PCR product with incorporated KpnI and XhoI restriction enzyme sites was subcloned into a pGL4.10 luciferase reporter plasmid (Promega, Madison, WI, USA). Additionally, 5 and 10 kb PCR products were subcloned into the XhoI site of the pGL4.10 luciferase reporter plasmid using the In-Fusion HD cloning kit (Takara, Kyoto, Japan). SW1353 cells were transfected with these *Mmp13* luciferase constructs together with the empty vector or Flag-Zfhx4. To introduce Osterix or Runx2 into cells, they were infected with corresponding adenoviruses at 40 h after transfection and incubated for 48 h. Luciferase activity was determined using specific substrates and a GloMax<sup>®</sup> Luminometer (Promega).

### **Chromatin immunoprecipitation (ChIP) assay**

ChIP analysis was performed using a truChIP Chromatin Shearing Kit (Covaris,

Woburn, MA, USA) in accordance with the manufacturer's instructions. Briefly, primary chondrocytes were cultured for 2 days and then washed with PBS. Chromatin was fixed with formaldehyde to crosslink proteins to the chromatin. Crosslinked chromatin was sonicated in a Covaris M220 (Covaris). Sonicated chromatin was incubated with an anti-Zfhx4 antibody (abcam, London, UK), anti-Runx2 antibody (Cell Signaling Technology), anti-Osterix antibody (abcam), or normal Rabbit IgG (Cell Signaling Technology), followed by immunoprecipitation with protein G-conjugated magnetic beads. Immunoprecipitates were amplified by PCR using primer sets specific for the *Mmp13* gene promoter (Supplementary Table 2).

### **Organ culture of the mouse maxilla**

Maxillary explant specimens were microdissected to be free of the mandible, tongue, and brain tissues from E14.2 WT and *Zfhx4*<sup>-/-</sup> littermates. Explants were placed in a glass vial with 2.25 ml Dulbecco's modified Eagle's medium/Nutrient Mixture F-12 (Sigma-Aldrich) and 0.75 ml BGJb medium (Life Technologies), and cultured for 2 days at 37°C with 5% CO<sub>2</sub> using a rotary culture system. At the end of the 2 days of culture, the explants were fixed in 4% paraformaldehyde. The specimens were whole-mount stained with DAPI and imaged by fluorescence microscopy.

### **Immunohistochemical analysis for the palatal shelf**

Samples fixed with 4% PFA in PBS were embedded in paraffin and cut into 7- $\mu$ m-thick sections. The sections were subjected to immunohistochemical staining using an anti-cleaved caspase 3 antibody (Cell Signaling Technology) at a 1:200 (v/v) dilution. Alexa Fluor 555-conjugated anti-rabbit IgG was used at a 1:500 (v/v) dilution as the secondary antibody for visualization under a fluorescence microscope. Counterstaining was performed using DAPI.

## Supplementary Table 1

### Sequence of primer sets for *Mmp13* luciferase construct

|      |                                              |
|------|----------------------------------------------|
| 1kb  | 5'-AGTGGTACCATTGAAGATTACAAAAAGACAGGCACT-3'   |
|      | 5'-TGACTCGAGAAAAGAGACCAAATAACCA-3'           |
| 5kb  | 5'-GCTCGCTAGCCTCGAGGGTACCAGGAGTGGGGTA-3'     |
|      | 5'-TCTTGATATCCTCGAGAGAGAAAAGAGACCAAATAACC-3' |
| 10kb | 5'-GCTCGCTAGCCTCGAGGTCAGGTGCAGGACTTTC-3'     |
|      | 5'-TCTTGATATCCTCGAGAGAAAAGAGACCAAATAACC-3'   |

# Red color: Sequence matched to the *Mmp13* gene promoter

# Black color: Sequence of region tagged for subcloning

## Supplementary Table 2

### Sequence of primer sets for *Mmp13* ChIP assay

|         |                                |
|---------|--------------------------------|
| Primer1 | 5'-CCATGGGGCTAGAAAGTTAGT-3'    |
|         | 5'-TCATCCAAGCATTACAACCTCTGA-3' |
| Primer2 | 5'-ACTAGCCTTGGACGACAGC-3'      |
|         | 5'-AATGAGGGTCCTTGAAGCGA-3'     |
| Primer3 | 5'-TGTGGCAGGACTCAATCATCT-3'    |
|         | 5'-ATAGTGGGGAGAAGCAGCAG-3'     |
| Primer4 | 5'-GGATTCTCACTGTTGCTGCT-3'     |
|         | 5'-CCTAAGTGTGGTTTGTGGCA-3'     |
| Primer5 | 5'-CTGCTGCTTCTCCCCACTAT-3'     |
|         | 5'-AAGAAGAAGGTGGCCAGGAT-3'     |
| Primer6 | 5'-TCCCTCAGATTCTGCCACAA-3'     |
|         | 5'-CCTCTGCAAACACAAGGTCT-3'     |

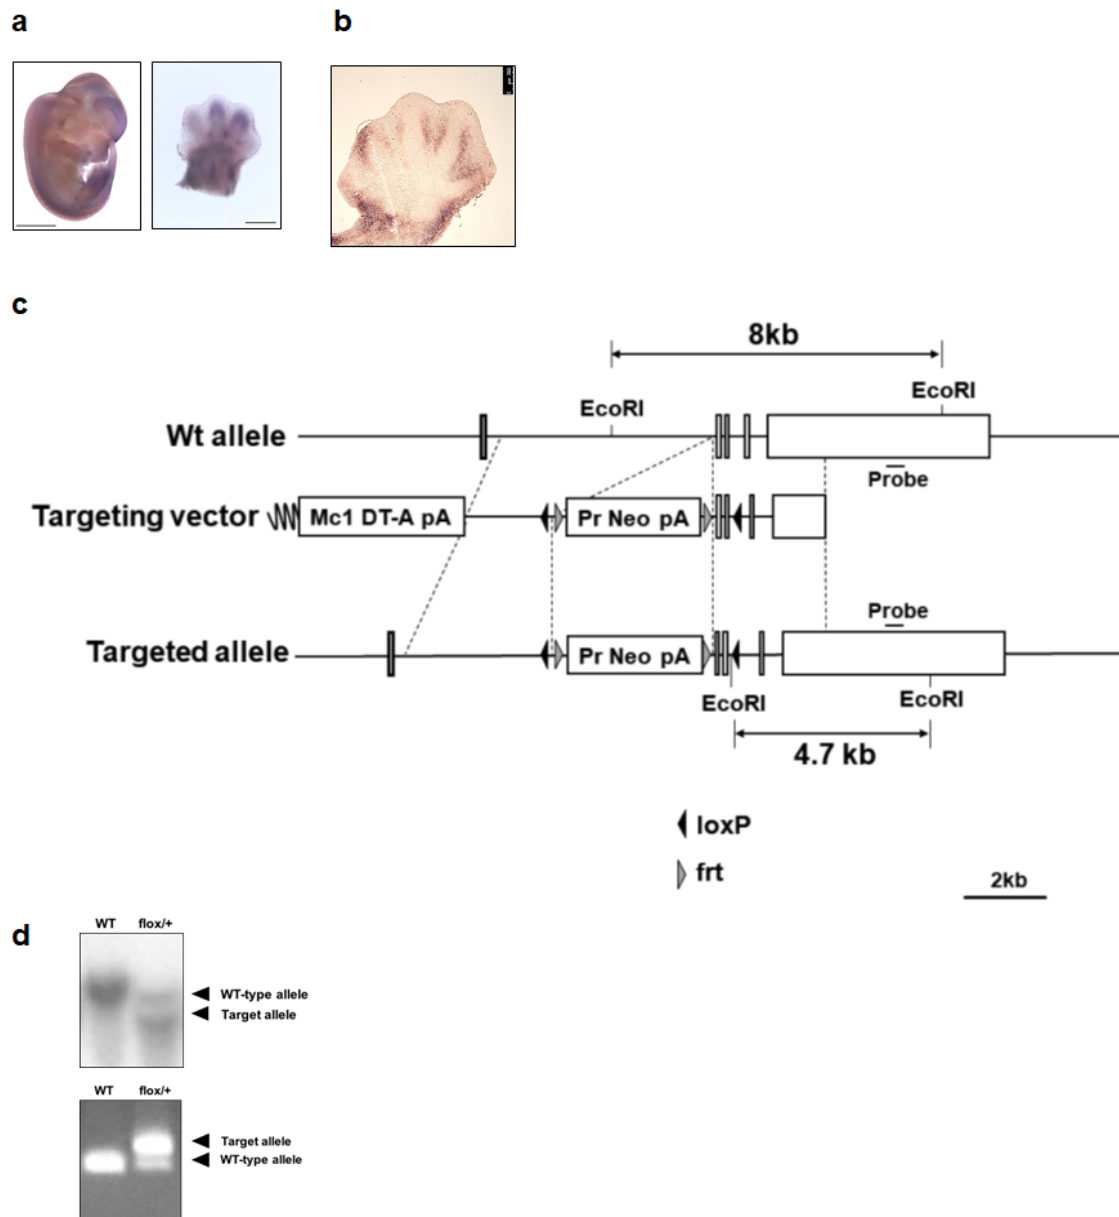

### Supplementary Figure 1

#### Expression of *Zfhx4* in the limb bud and generation of *Zfhx4* floxed mice.

- (a) Expression of *Zfhx4* in developing limbs of E12.5 mice determined by whole mount *in situ* hybridization. Scale bars = 2 mm (left panel) and 500  $\mu$ m (right panel).
- (b) Expression of *Zfhx4* in developing limbs of E12 mice determined by *in situ* hybridization. Scale bar = 250  $\mu$ m
- (c) Schematic diagram of *Zfhx4* floxed mice.
- (d) Genotype analyses of *Zfhx4* floxed mice. Generation of heterozygous *Zfhx4* floxed mice was confirmed by Southern blotting (upper panel) and polymerase

chain reaction (lower panel).



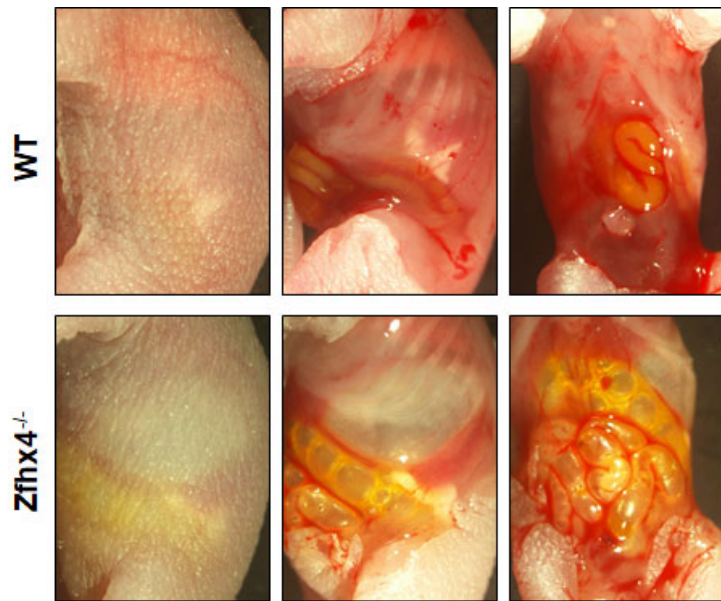

## Supplementary Figure 2

### Gastrointestinal tracts of *Zfhx4*<sup>-/-</sup> mice.

Photographs of entire gastrointestinal tracts of *Zfhx4*<sup>-/-</sup> mice, which were filled with air. WT: wild-type

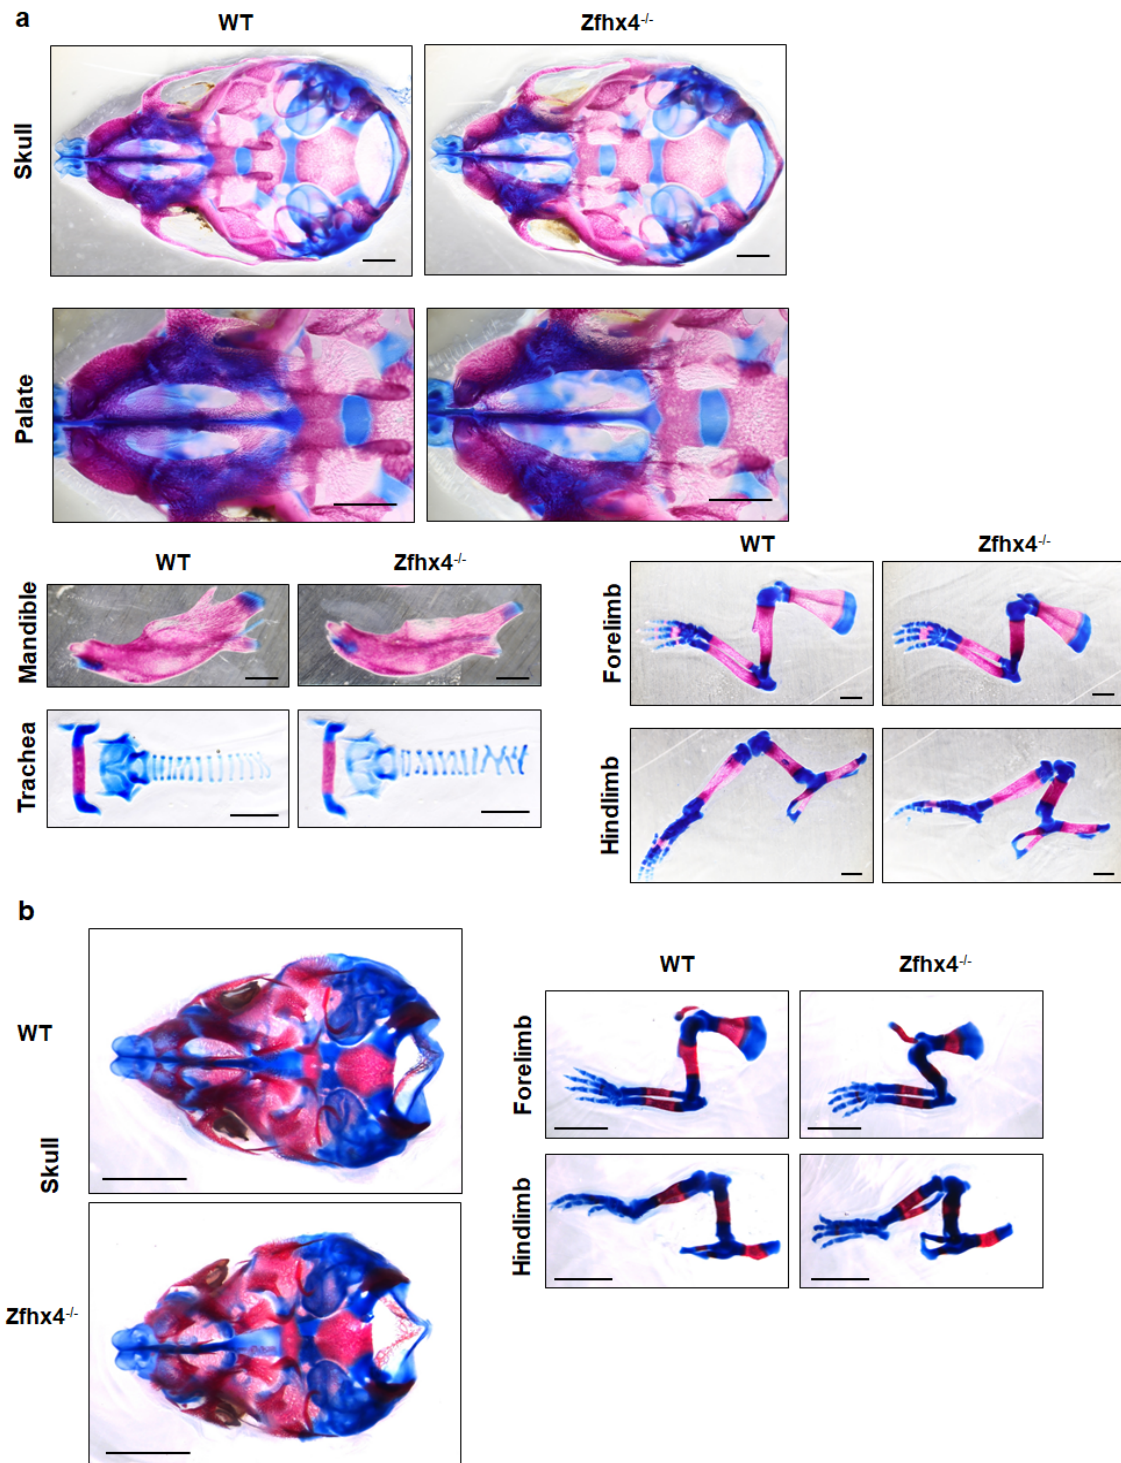

### Supplementary Figure 3

#### Skeletal phenotypes of $Zfhx4^{-/-}$ mice.

(a) Microscopy images of skull, palate, mandible, trachea, forelimb, and hindlimb skeletal preparations stained with Alcian blue and alizarin red at P0. Wild-type (WT) and  $Zfhx4^{-/-}$  littermates are shown. Scale bar = 1 mm.

(b) Microscopy images of skull, forelimb, and hindlimb skeletal preparations of E16.5 WT and *Zfhx4*<sup>-/-</sup> littermates stained with Alcian blue and alizarin red. Scale bar = 2 mm.

a

| Genotype          | WT        | Zfhx4 <sup>+/-</sup> | Zfhx4 <sup>-/-</sup> |
|-------------------|-----------|----------------------|----------------------|
| Number of pups    | 2         | 6                    | 4                    |
| Dwarf pups<br>(%) | 0<br>(0%) | 0<br>(0%)            | 4<br>(100%)          |

b

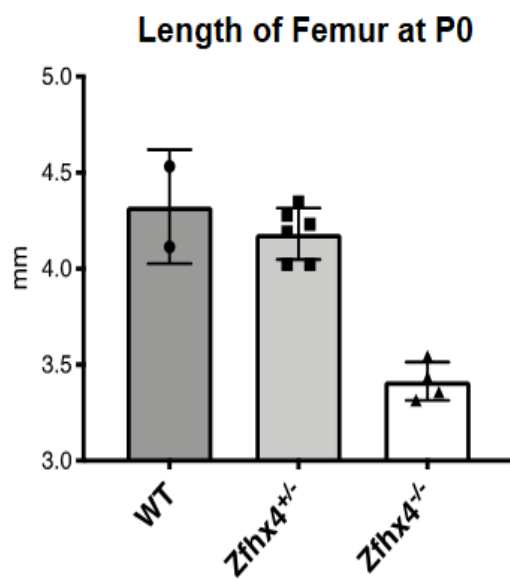

#### Supplementary Figure 4

##### Dwarf phenotypes of *Zfhx4*<sup>-/-</sup> mice.

(a) *Zfhx4*<sup>+/-</sup> mice were mated, and the dwarf phenotypes of the pups were examined at P0. WT: wild-type

(b) The length of femurs of these mice were measured after skeletal preparation. n: wild-type = 2, *Zfhx4*<sup>+/-</sup> = 6, *Zfhx4*<sup>-/-</sup> = 4

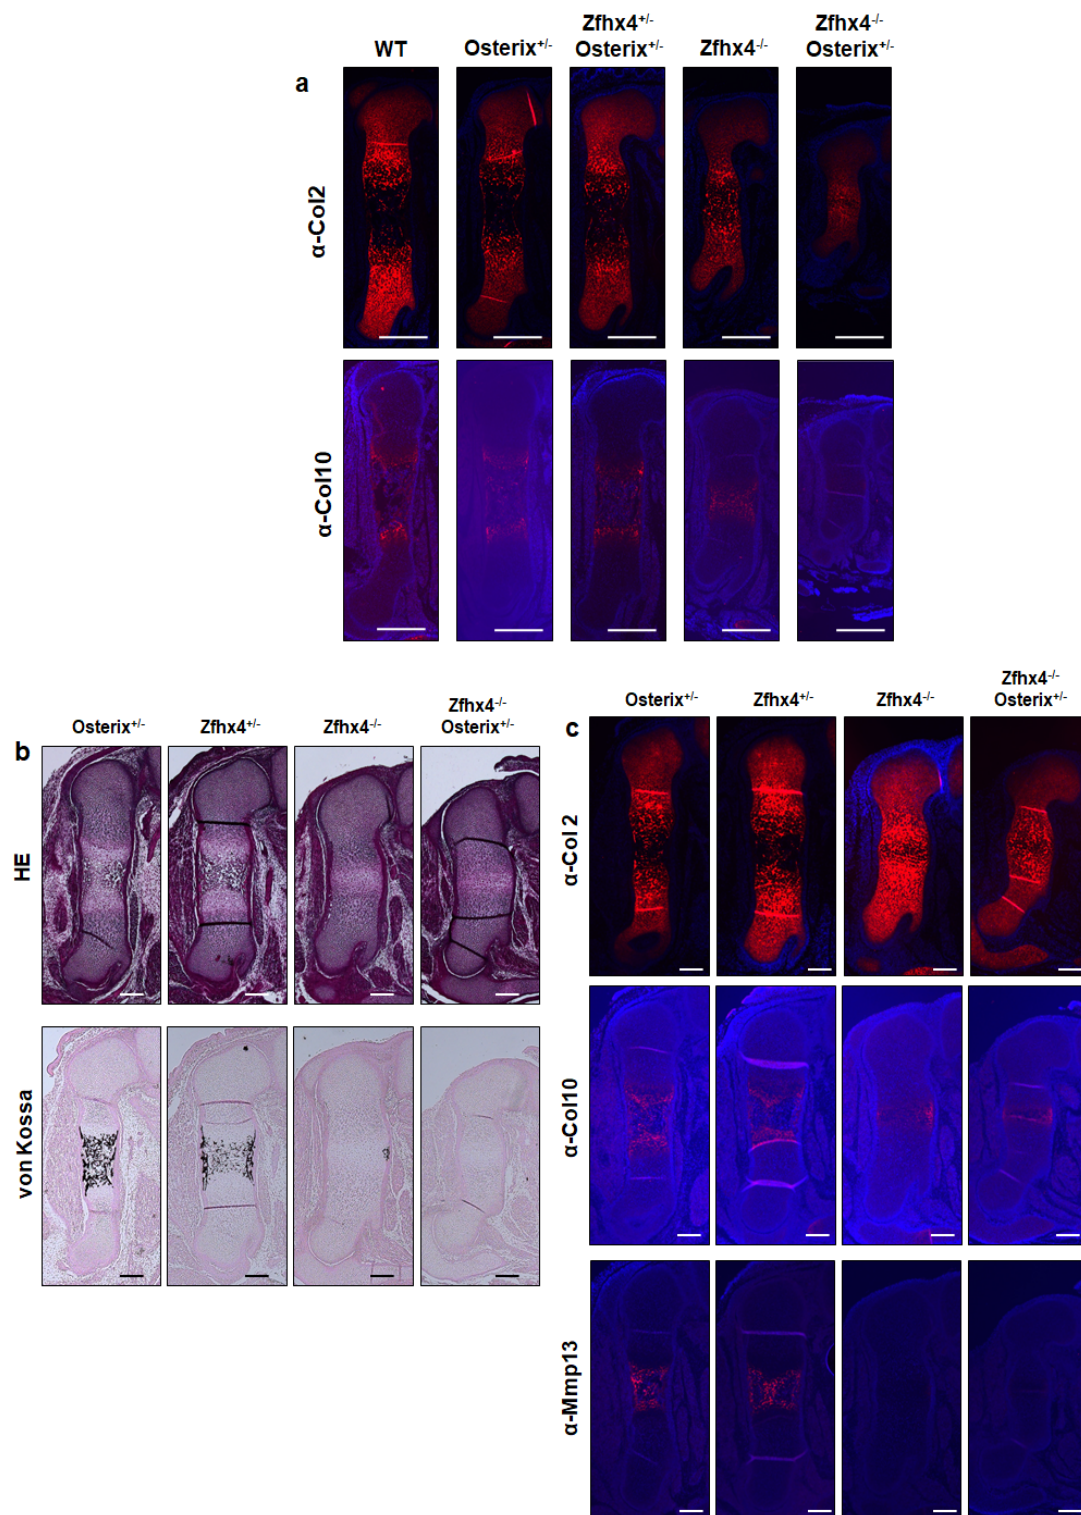

### Supplementary Figure 5

#### Phenotypes of femurs of *Zfhx4*<sup>-/-</sup>; *Osterix*<sup>+/-</sup> mice.

(a) Microscopy images of femurs of E16.5 wild-type (WT), *Osterix*<sup>+/-</sup>, *Zfhx4*<sup>+/-</sup>; *Osterix*<sup>+/-</sup>, *Zfhx4*<sup>-/-</sup>, and *Zfhx4*<sup>-/-</sup>; *Osterix*<sup>+/-</sup> mice analyzed by

immunofluorescence staining with anti-Col2 and -Col10 antibodies. Scale bar = 500  $\mu$ m.

- (b) Microscopy images of femurs from E15.5 *Osterix*<sup>+/-</sup>, *Zfhx4*<sup>+/-</sup>, *Zfhx4*<sup>-/-</sup>, and *Zfhx4*<sup>-/-</sup>;*Osterix*<sup>+/-</sup> mice subjected to hematoxylin and eosin (HE) and von Kossa staining. Scale bar = 200  $\mu$ m.
- (c) Microscopy images of femurs from E15.5 *Osterix*<sup>+/-</sup>, *Zfhx4*<sup>+/-</sup>, *Zfhx4*<sup>-/-</sup>, and *Zfhx4*<sup>-/-</sup>;*Osterix*<sup>+/-</sup> mice determined by immunofluorescence staining with anti-Col2, -Col10, and -Mmp13 antibodies. Scale bar = 200  $\mu$ m.

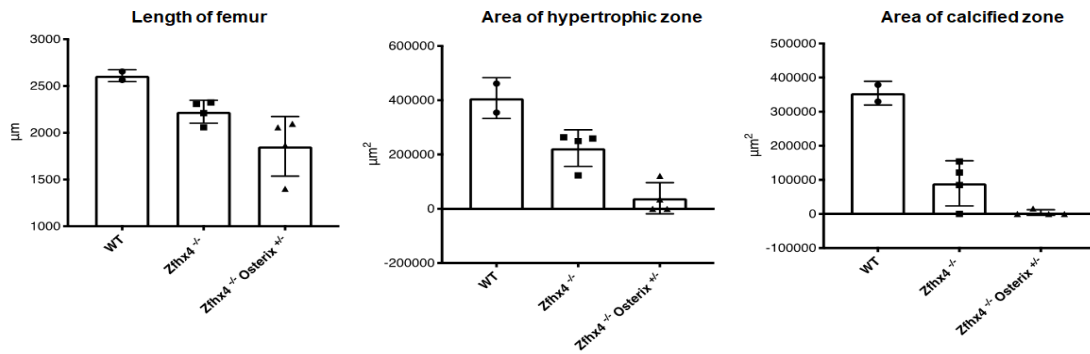

### Supplementary Figure 6

#### Decreased hypertrophic and calcified area in *Zfhx4*<sup>-/-</sup>; *Osterix*<sup>+/-</sup> mice.

*Zfhx4*<sup>+/-</sup> and *Zfhx4*<sup>+/-</sup>; *Osterix*<sup>+/-</sup> mice were mated, and obtained aged-matched littermate embryos. The length and areas of hypertrophic and calcified zone of the femurs of the embryos were measured at E16.5. n: wild-type (WT) = 2, *Zfhx4*<sup>-/-</sup> = 4, *Zfhx4*<sup>-/-</sup>; *Osterix*<sup>+/-</sup> = 4

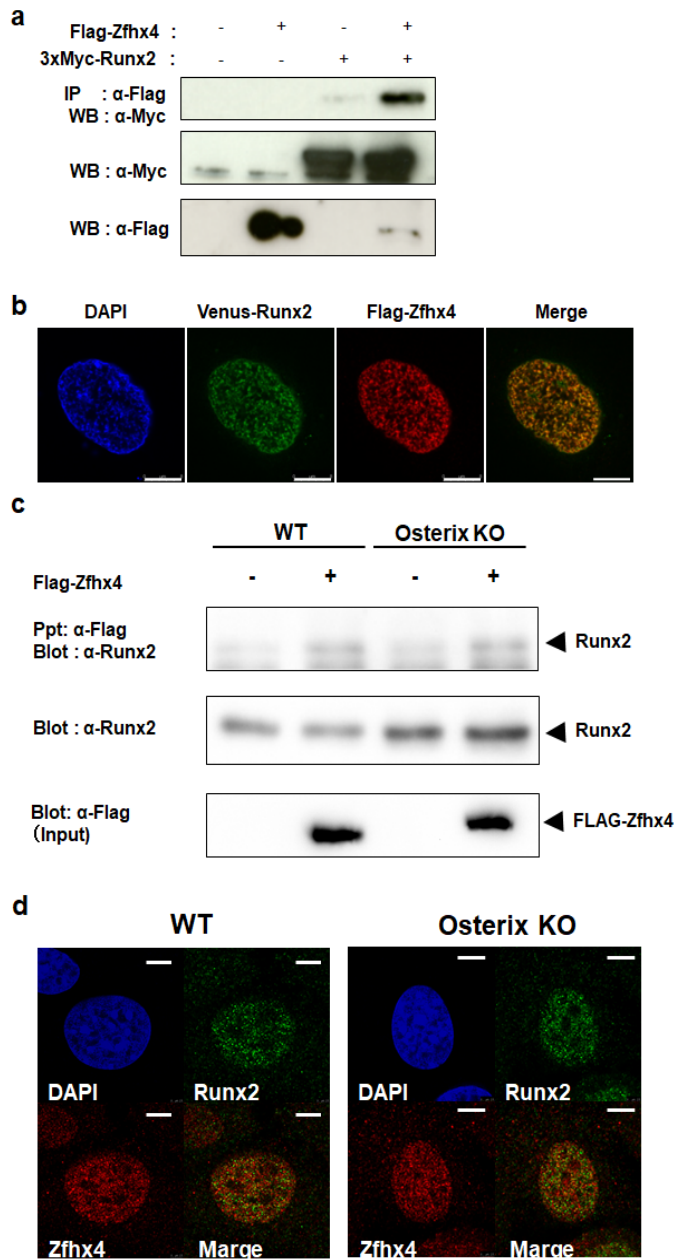

## Supplementary Figure 7

### Interaction of Zfhx4 with Runx2.

- (a) Coimmunoprecipitation analysis of lysates of 293FT cells transfected with Flag-Zfhx4, 3xMyc-Runx2, or both. IP: immunoprecipitation; WB: western blotting.
- (b) Colocalization of Flag-Zfhx4 (red) and Venus-Runx2 (green) in SW1353 cells. Scale bar = 8  $\mu$ m.
- (c) Association of Zfhx4 with Runx2 in WT and *Osterix* knockout (KO) mouse limb bud cells in vitro. Ppt: precipitation



(d) Colocalization of Zfhx4 and Runx2 in WT and *Osterix* KO mouse chondrocytes. Scale bar = 5  $\mu\text{m}$ .

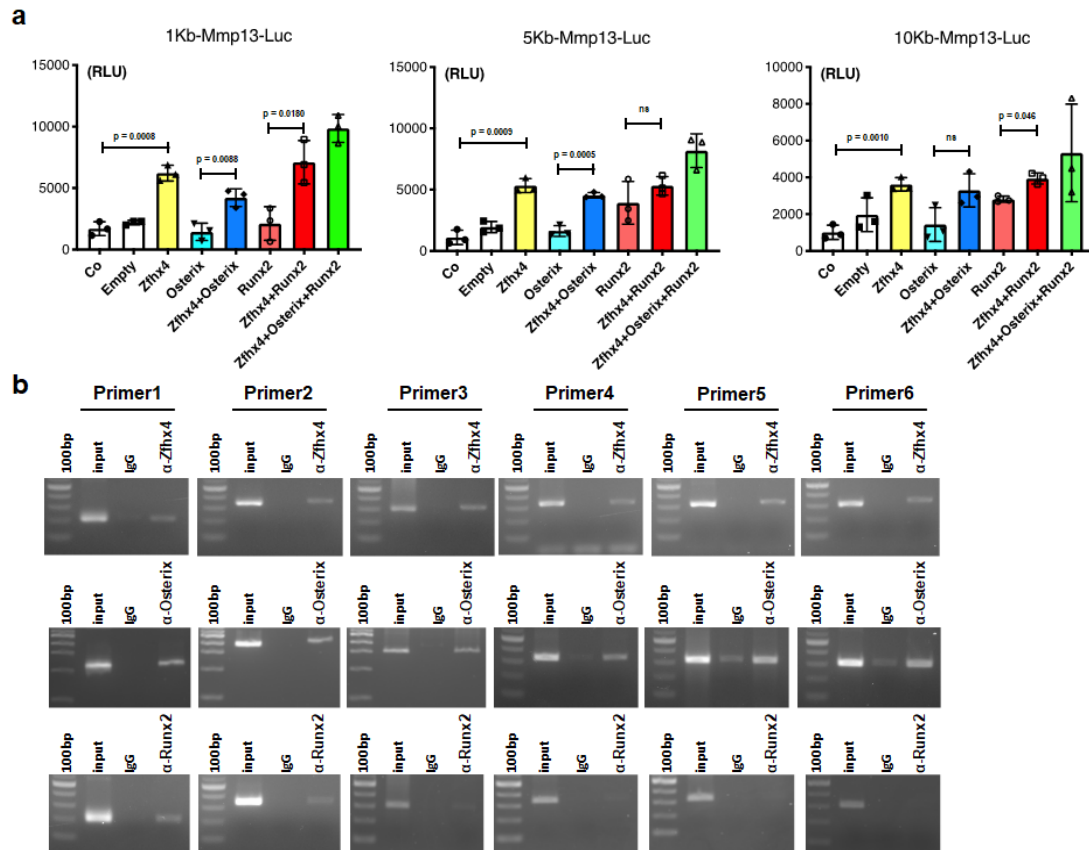

### Supplementary Figure 8

#### Regulation of the *Mmp13* gene promoter by Zfhx4, Osterix, and Runx.

- (a) Luciferase reporter assay using SW1353 cells transfected with 1, 5, or 10 kb *Mmp13* gene luciferase promoter regions together with Zfhx4, Osterix, Runx2, or their combination as indicated.
- (b) Chromatin immunoprecipitation analyses of mouse chondrocytes using anti-Zfhx4 (top), -Osterix (middle), or -Runx2 (bottom) antibodies. Binding to the *Mmp13* gene was amplified by primer sets as indicated.

**a**

| Genotype              | WT     | Zfhx4 <sup>+/-</sup> | Zfhx4 <sup>-/-</sup> |
|-----------------------|--------|----------------------|----------------------|
| Number of pups        | 23     | 30                   | 25                   |
| Cleft palate pups (%) | 0 (0%) | 0 (0%)               | 25 (100%)            |

**b**

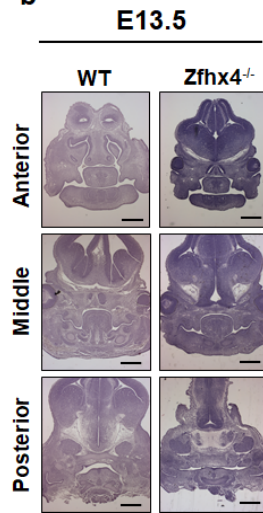

**c**

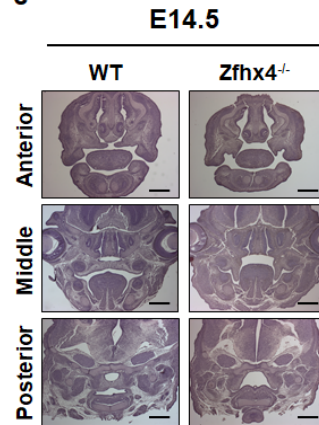

**d**

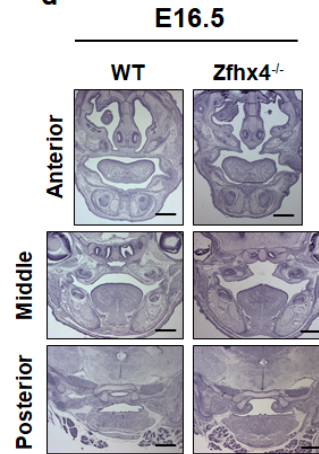

### Supplementary Figure 9

#### Failure of elevation of palatal shelves in *Zfhx4*<sup>-/-</sup> mice.

(a) Penetrance of cleft palate in *Zfhx4*<sup>-/-</sup> mice.

(b–d) Lower magnification images of coronal sections from the anterior, middle, and posterior of crania of E13.5 (b), E14.5 (c), and E16.5 (d) wild-type (WT) and *Zfhx4*<sup>-/-</sup> littermates shown in Figure 4b. Scale bar = 500 μm.

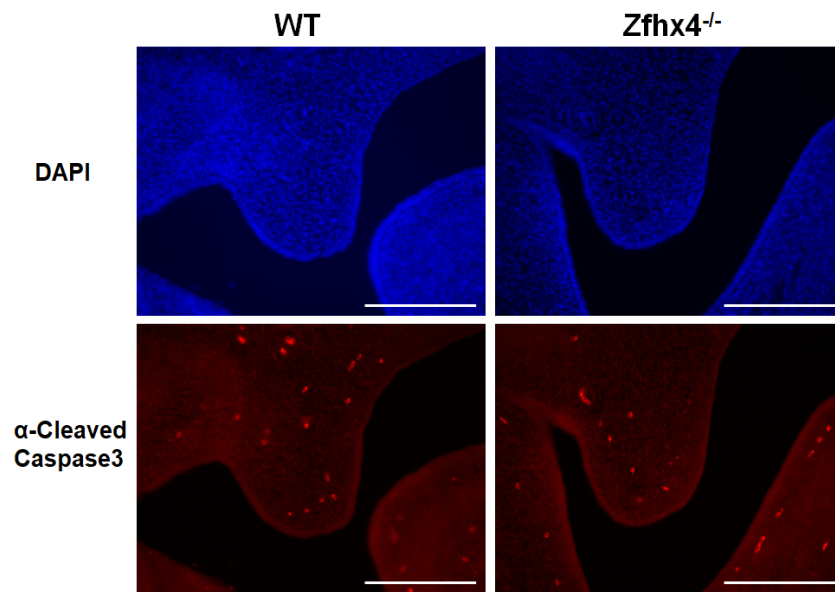

**Supplementary Figure 10**

**No apoptotic state in the palatal shelf of *Zfhx4*<sup>-/-</sup> mice.**

Immunofluorescence analyses of palatal shelves in E13.5 wild-type (WT) and *Zfhx4*<sup>-/-</sup> littermates using an anti-cleaved caspase 3 antibody. Scale bar = 200  $\mu\text{m}$ .

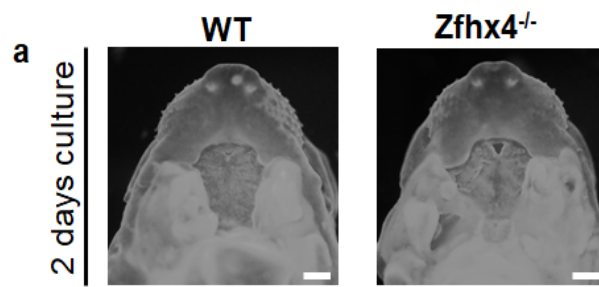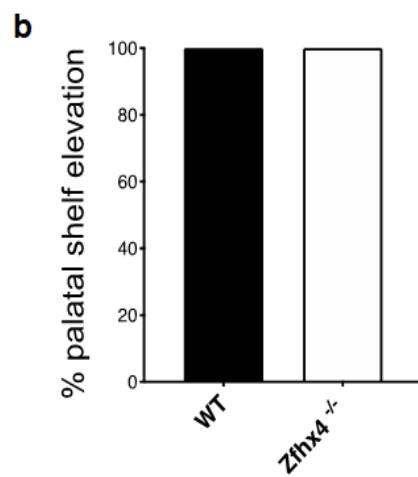

### Supplementary Figure 11

#### Elevation of the palatal shelf of *Zfhx4*<sup>-/-</sup> mice ex vivo.

(a) Photograph of organ-cultured maxilla specimens isolated from E14.2 wild-type (WT) and *Zfhx4*<sup>-/-</sup> littermates. Scale bar = 500  $\mu$ m.

(b) Frequency of palatal shelf elevation in (a). n = 6.

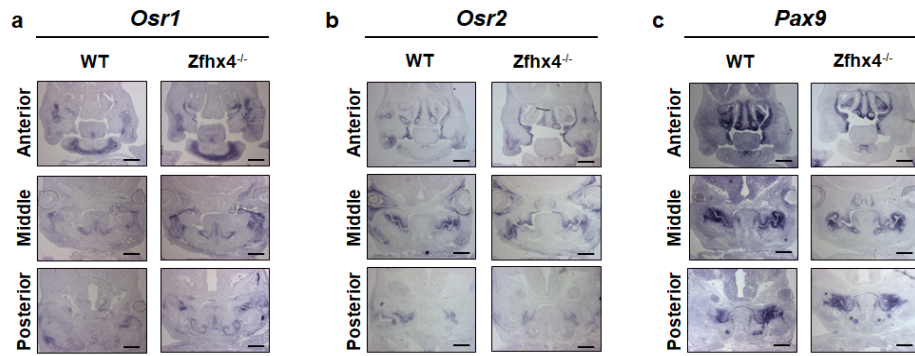

### Supplementary Figure 12

#### Expression of *Osr1*, *Osr2*, and *Pax9* in *Zfhx4*<sup>-/-</sup> mice.

(a–c) Lower magnification images of coronal sections from anterior, middle, and posterior crania of E13.5 wild-type (WT) and *Zfhx4*<sup>-/-</sup> littermates shown in Figure 4f. Expression of *Osr1* (a), *Osr2* (b), and *Pax9* (c) determined by *in situ* hybridization. Scale bar = 500  $\mu$ m.

a

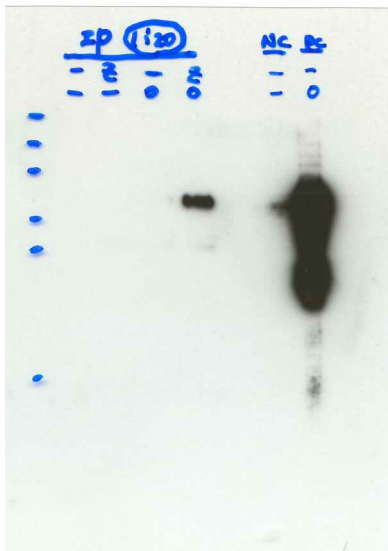

b

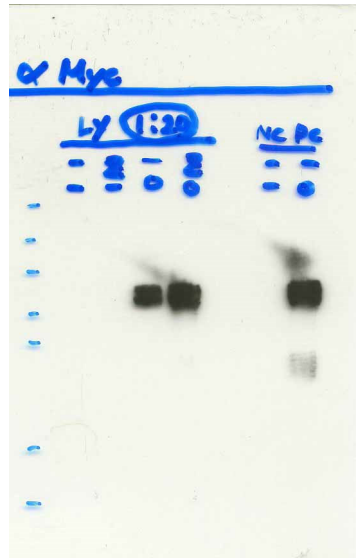

c

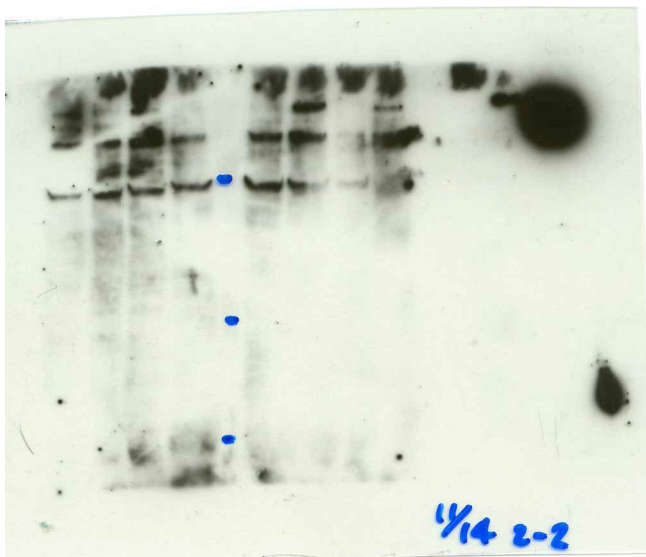

### Supplementary Figure 13

The original uncropped images of Figure 3a. (a) the top panel of Figure 3a, (b) the middle panel of Figure 3a, and (c) the bottom panel of Figure 3a.
