# Supplementary material for: Zfhx4 regulates endochondral ossification as the transcriptional platform of Osterix in mice
Source: PubMed Central journal article supplement (PMC8566502; doi:10.1038/s42003-021-02793-9), 2021-11-03
Supplement: 42003_2021_2793_MOESM3_ESM.pdf [file 42003_2021_2793_MOESM3_ESM.pdf]

## Description of Additional Supplementary Files

**File name:** Supplementary Data 1.

**Description:** Source data for the graphs and charts in the main figures.
